# Supplementary material
Source: bioRxiv or medRxiv preprint supplement (https://medrxiv.org/highwire/filestream/73297/field_highwire_adjunct_files/1/2020.03.05.20031583-2.pdf)
Supplement: Supplementary file [file 2020.03.05.20031583-2.pdf]

**Table A.2:** Summary of maternal experience and assessment of breastfeeding during vitamin B12 delivery via a nipple shield whilst feeding.

|                                            | Agree-<br>ment [%] | Strongly<br>agree [%] | Quote                                                                                                                                                                                                                                                                                                                                                                                                                                                                                                                                                                                                                                                                                                                                                                                                                                          |
|--------------------------------------------|--------------------|-----------------------|------------------------------------------------------------------------------------------------------------------------------------------------------------------------------------------------------------------------------------------------------------------------------------------------------------------------------------------------------------------------------------------------------------------------------------------------------------------------------------------------------------------------------------------------------------------------------------------------------------------------------------------------------------------------------------------------------------------------------------------------------------------------------------------------------------------------------------------------|
| The nipple shield with a vitamin tablet... |                    |                       |                                                                                                                                                                                                                                                                                                                                                                                                                                                                                                                                                                                                                                                                                                                                                                                                                                                |
| ...was a positive experience.              | 95                 | 45                    | <ul style="list-style-type: none"> <li>• I think it surpassed my expectation. Mainly because I was slightly concerned about using this silicone and having the tablet, and how it would all work. Whereas now that I have done it, I can see that it is actually quite a natural process. [...] I wish I'd be able to administer all medicines like that rather than using syringes. (M5, no NS)</li> <li>• It was pleasantly surprising, really. [...] You know, it was just an idea before, and now having done it, I feel good about it. I would say that it exceeded my expectations. (M1, NS)</li> <li>• I think after doing it, using the shield, and having him breastfeeding normally on it, I'd say it was a really positive experience. [...] I really think it is a more natural way to deliver the vitamin. (M4, no NS)</li> </ul> |
| ...was easy to use.                        | 95                 | 65                    | <ul style="list-style-type: none"> <li>• [...] this was just such a smooth, easy process. (M5, no NS)</li> <li>• It was really easy to put on. (M7, no NS)</li> <li>• [...] I didn't feel that I was giving him medicine at all. (M6, NS)</li> <li>• I think this method of being able to give medication is so much easier. [...] You are not having to use a syringe necessarily to give the medication, which can be quite difficult. [...] It's part of what would have been your everyday routine anyway, instead of having to include something that's not necessarily something that they would want to do. (M20, no NS)</li> </ul>                                                                                                                                                                                                     |
| ...was comfortable to wear.                | 95                 | 65                    | <ul style="list-style-type: none"> <li>• I thought it might be... I don't know awkward or difficult. I thought the shield might slip off, or something. But it was actually very comfortable. (M12, no NS)</li> <li>• How comfortable the shield was for me [...] - I was quite surprised. (M5, no NS)</li> <li>• You know, I was aware that there was a layer in between. But then it was less painful for me - the whole idea of the nipple shield is to ease the pain of the nipple, so that actually made it more comfortable anyway. (M4, no NS)</li> <li>• [Breastfeeding] is a bit different with a shield, 'cause you don't necessarily get the same contact. But I think for the benefits it's not enough to worry about. Because the benefits far outweigh that. (M20, no NS)</li> </ul>                                             |

| My baby....             |    |    |                                                                                                                                                                                                                                                                                                                                                                                                                                                                                                                                                                                                                      |
|-------------------------|----|----|----------------------------------------------------------------------------------------------------------------------------------------------------------------------------------------------------------------------------------------------------------------------------------------------------------------------------------------------------------------------------------------------------------------------------------------------------------------------------------------------------------------------------------------------------------------------------------------------------------------------|
| ...latched as usual.    | 95 | 65 | <ul style="list-style-type: none"> <li>• I was surprised how easily he still latched, and that he didn't even notice that there was a nipple shield in the way. (M7, no NS)</li> <li>• I think he thought it was a bit strange at first because he has not had to use a breast shield before. So it was obviously a different texture to what he was used to. But once he got used to it, it didn't stop him at all. [...] it [also] hasn't stopped him then going onto the other side, which didn't have the breast shield on – which is a positive. (M20, no NS)</li> </ul>                                        |
| ...breast-fed as usual. | 90 | 65 | <ul style="list-style-type: none"> <li>• I couldn't tell any difference between feeding him with the tablet in there or without. [...] it was completely flawless, it just worked perfectly. (M6, NS)</li> <li>• I was expecting more hurdles there. But there weren't any. She did very well. She didn't have any problems with taste or anything changing. [...] I think that was my main concern initially: How would she react to it having the change? And she was absolutely comfortable with it. (M8, no NS)</li> <li>• That surprised me the most, that he just didn't seem bothered. (M5, no NS)</li> </ul> |
